# Supplementary material for: Dimensional control of supramolecular assemblies of diacetylene-derived peptide gemini amphiphile: from spherical micelles to foamlike networks
Source: Royal Society of Chemistry journal article supplement (doi:10.1039/c8sm00512e), 2018-01-01
Supplement: c8sm00512e1.pdf [file c8sm00512e1.pdf]

# Dimensional Control of Supramolecular Assemblies of Diacetylene-Derived Peptide Gemini Amphiphile: From Spherical Micelles to Foamlike Networks

Hao Jiang,<sup>a</sup> Martin Ehlers,<sup>a</sup> Xiao-yu Hu,<sup>a,b</sup> Elio Zellermann<sup>a</sup> and Carsten Schmuck<sup>\*a</sup>

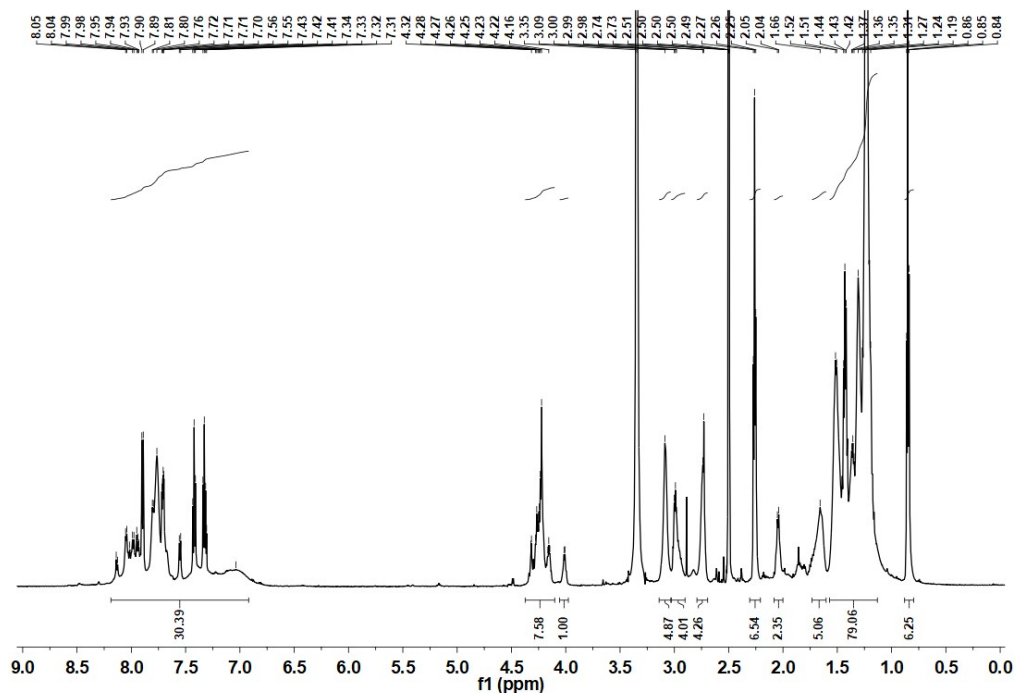

**Figure S1.** <sup>1</sup>H NMR of DA<sub>2</sub>P-Fmoc in DMSO-d<sub>6</sub> recorded at 600 MHz.

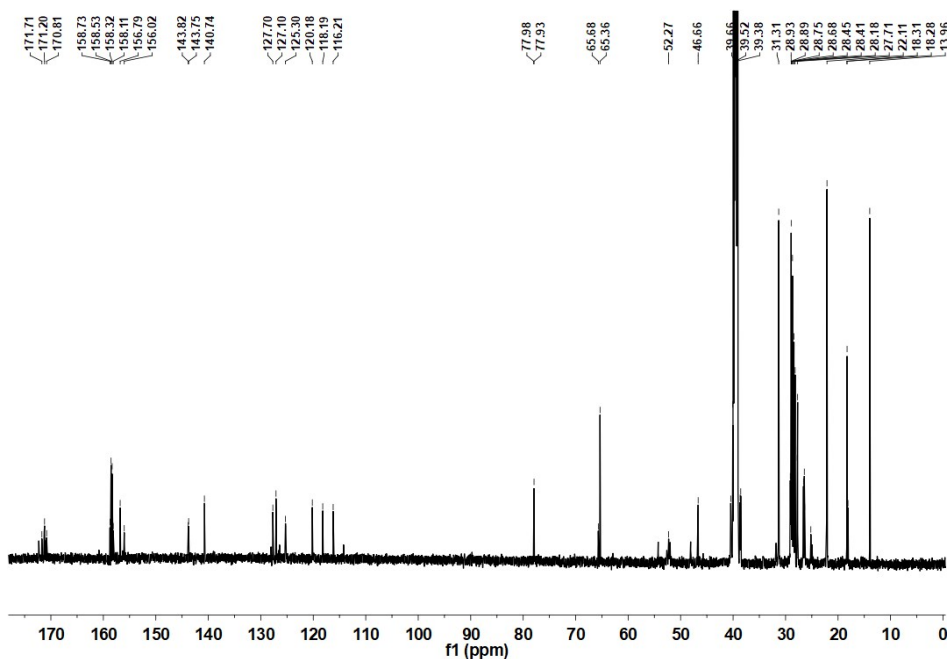

**Figure S2.** <sup>13</sup>C NMR of DA<sub>2</sub>P-Fmoc in DMSO-d<sub>6</sub> recorded at 151 MHz.

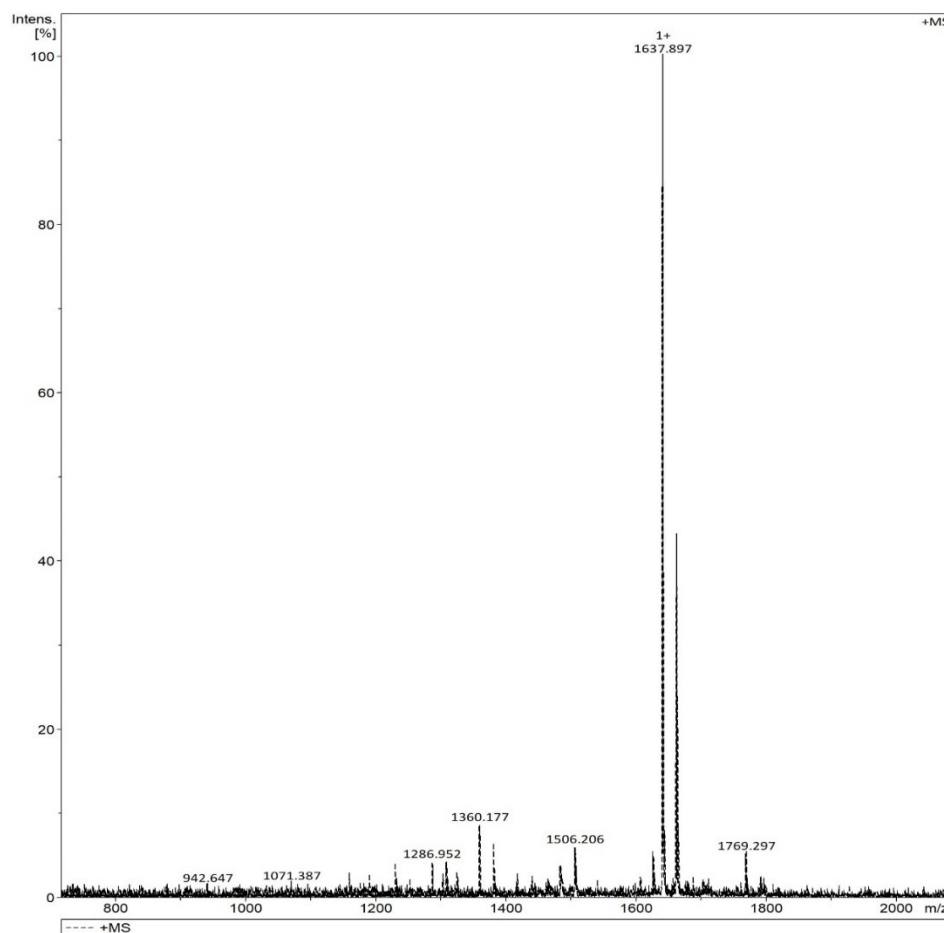

**Figure S3.** MALDI-TOF-MS spectrum of **DA<sub>2</sub>P-Fmoc** m/z calculated for C<sub>93</sub>H<sub>150</sub>N<sub>16</sub>O<sub>9</sub> 1636.29, found [M + H]<sup>+</sup> 1637.90.

### Sample preparation for AFM and TEM measurements

AFM images were obtained in tapping mode using a NanoDrive Controller with an Innova Scanning Probe Microscope (Veeco Germany, Mannheim) and N-type silicon cantilever (AC 160TS OLYMPUS). A drop of prepared sample solution (6  $\mu$ L, pure water or methanol) was placed on freshly cleaved mica and then spin-coated at a speed of 3000 rad/min for 2 min. The AFM data were analysed using Gwiddion-2.20 software. TEM images were obtained using a CM 200 FEG (Phillips Company). A drop of prepared sample solution was placed on 400-mesh formvar copper grid coated with carbon. After 2 min, the grid was tapped with a

filter paper to remove remaining solvent from the surface. Negative staining was performed by addition of a drop of an aqueous solution of uranyl acetate (2%) onto the copper grid. After 1 min, the liquid on the surface of the grid was removed by tapping it with a filter paper.

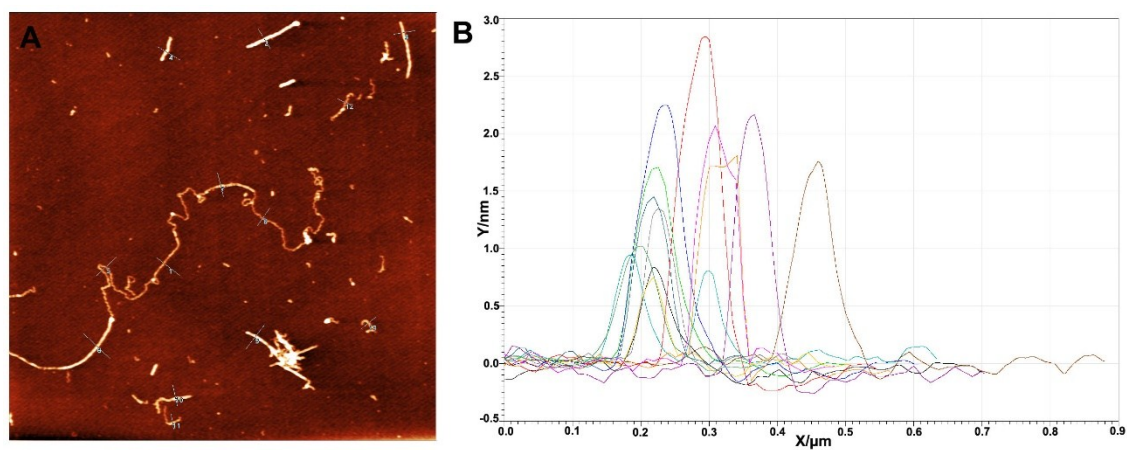

**Figure S4.** (A) Height image and (B) section analysis of AFM measurement of **DA<sub>2</sub>P-Fmoc** assemblies at the concentration of 0.2 mM with an aging time up to 1 month.



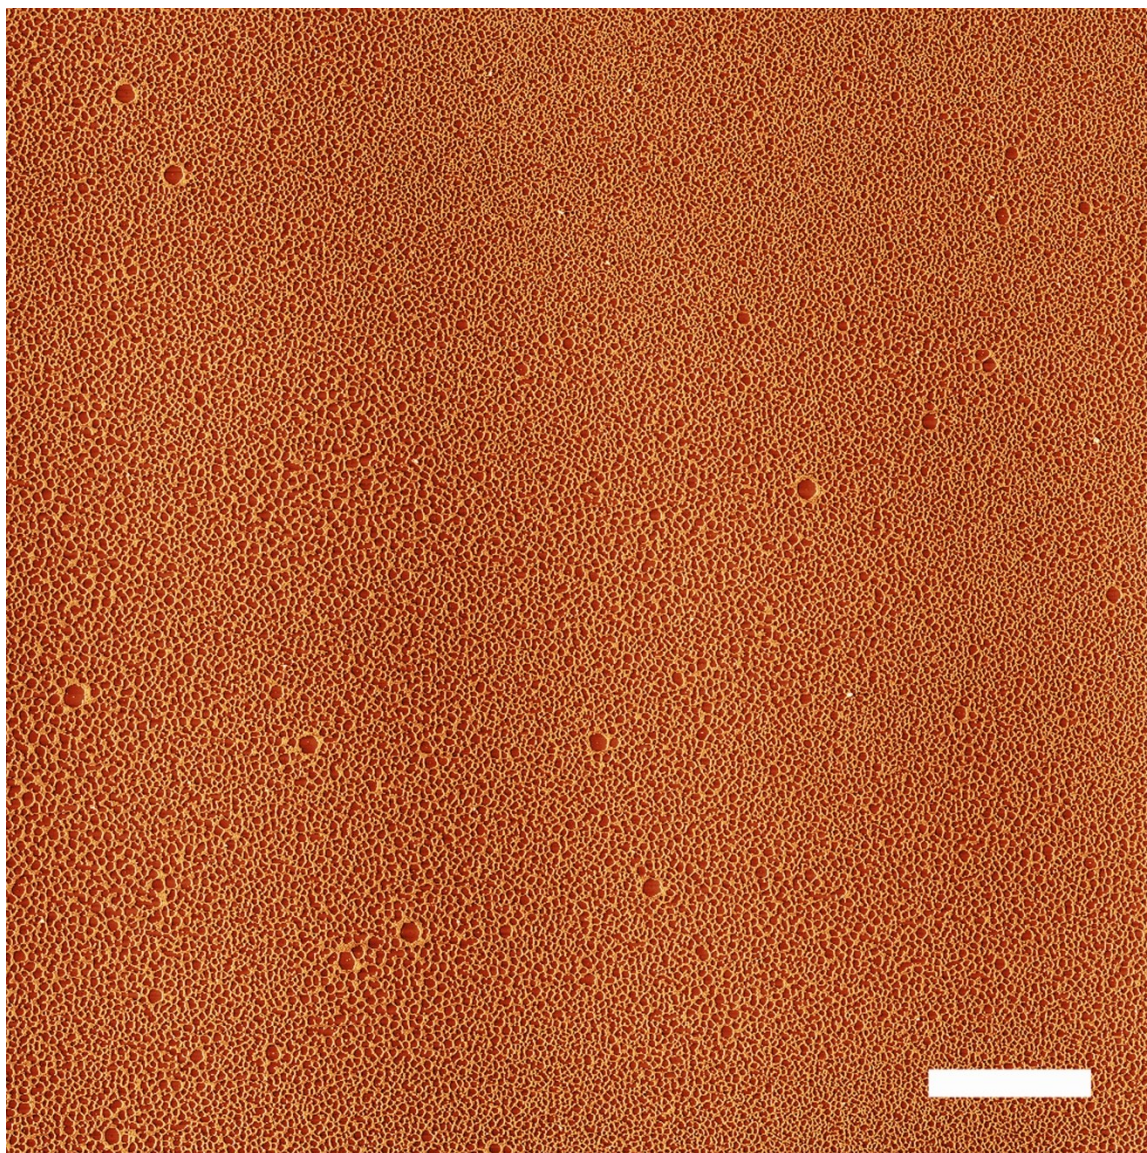

**Figure S5.** (A) AFM image in a large area ( $70 \times 70 \mu\text{m}$ ) of **DA<sub>2</sub>P-Fmoc** assemblies at the concentration of 1 mM in methanol with an aging time of 10 days. Scale bar is 10  $\mu\text{m}$ .



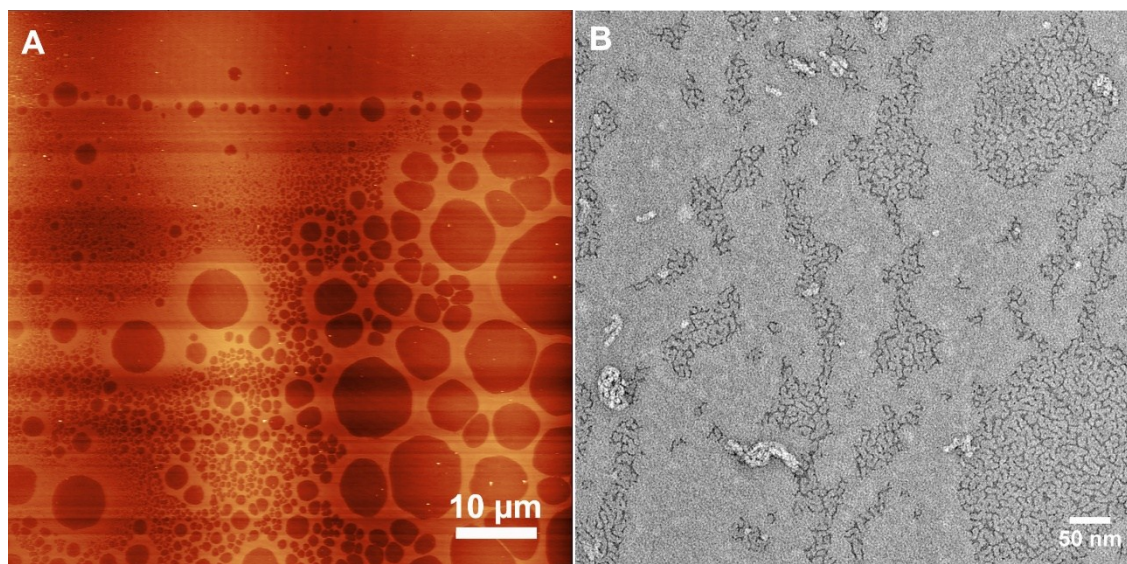

**Figure S6.** (A) AFM image of **DA<sub>2</sub>P-Fmoc** assemblies in the outer region of spin-coated film and (B) TEM image of drop-casted film at the concentration of 1 mM in methanol with an aging time of 10 days.

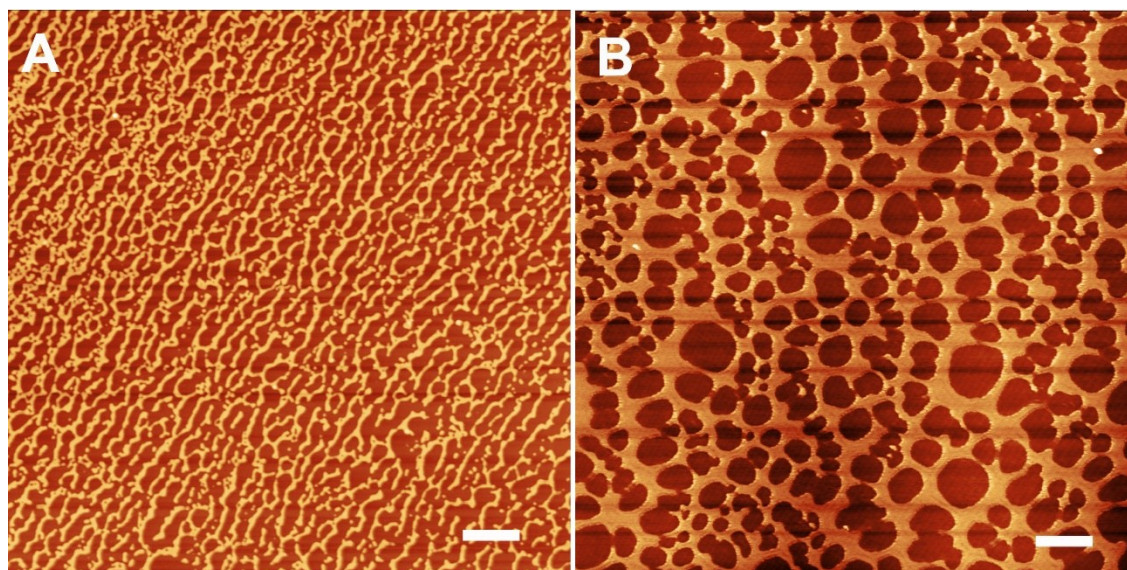

**Figure S7.** AFM images of **DA<sub>2</sub>P-Fmoc** assemblies at the concentration of (A) 0.05 mM and (B) 0.2 mM in methanol with the aging effect. Scale bars are 1  $\mu\text{m}$ .
